# Supplementary material
Source: PubMed Central journal article supplement (PMC9381392)

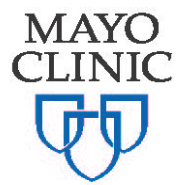

200 First Street SW  
Rochester, MN 55905  
(507) 284-3335  
**Scientific Publications**

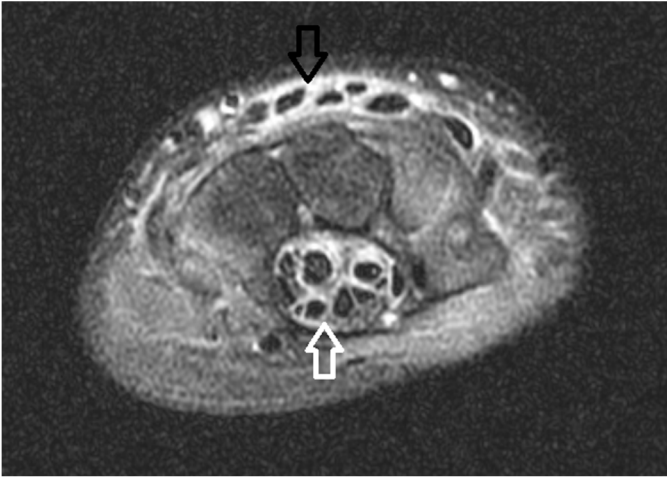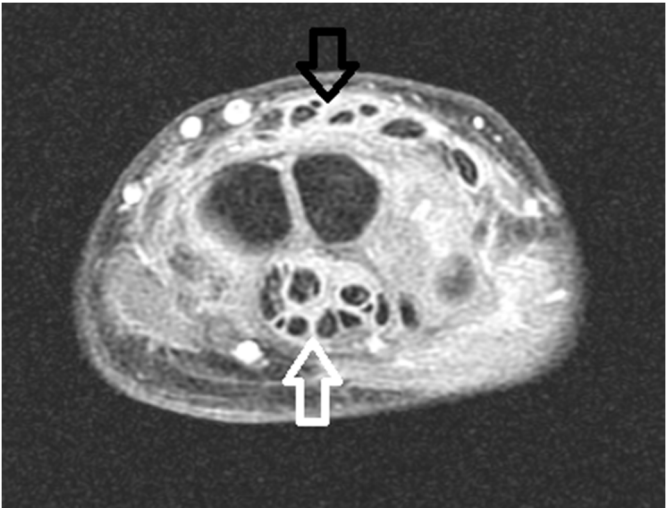

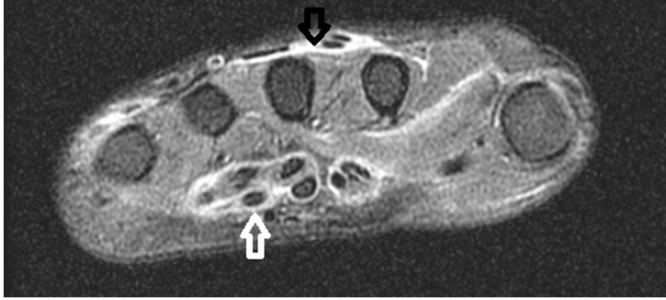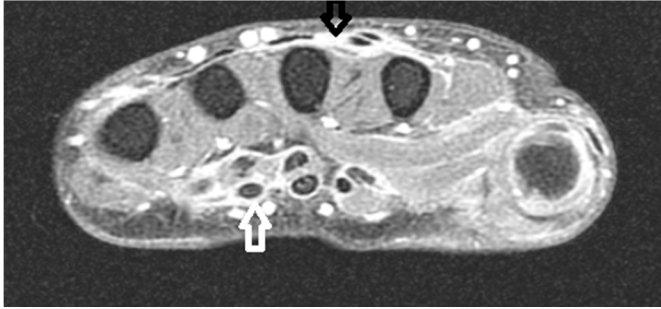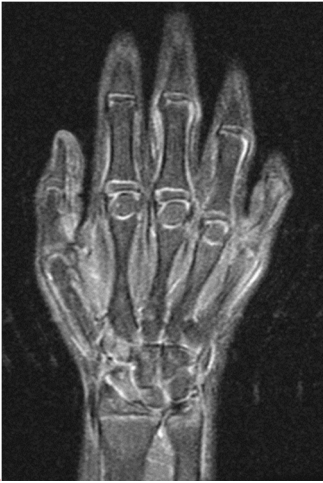

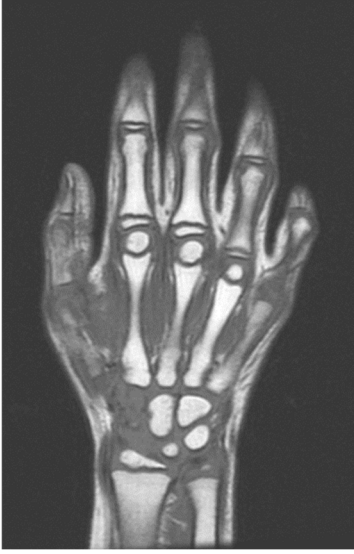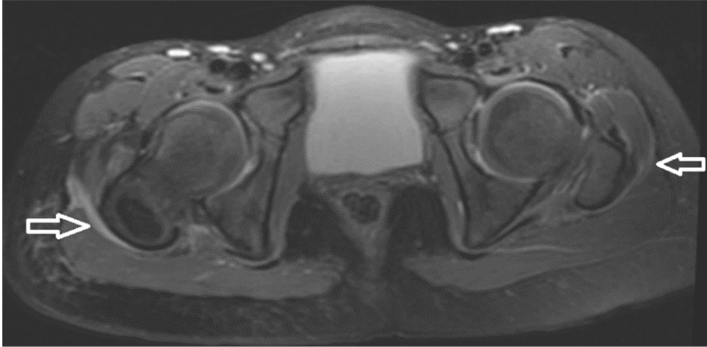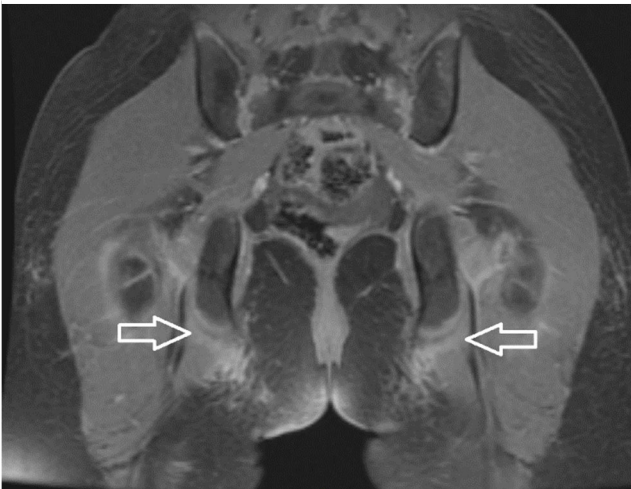

Supplement: 10875_2022_1346_MOESM1_ESM.pdf [file 10875_2022_1346_MOESM1_ESM.pdf]
